# Supplementary material for: Cannabis use during pregnancy and its effect on the fetus, newborn and later childhood: A systematic review
Source: PubMed Central journal article supplement (PMC10401888; doi:10.18332/ejm/168727), 2023-08-04
Supplement: EJM-7-19-s1.pdf [file EJM-7-19-s1.pdf]

### ***Supplementary Material***

1. Abel EL, Bush R, Dintcheff BA, Ernst CA. Critical periods for marijuana-induced intrauterine growth retardation in the rat. *Neurobehavioral Toxicology and Teratology* 1981; 3 (3): 351-354. doi: does not exist. **Reason for rejection:** The study population is animals.
2. Abel EL. Effects of prenatal exposure to cannabinoids. *Effects of prenatal exposure to cannabinoids* 1985; 59: 20-35. doi: does not exist. **Reason for rejection:** The full text is not available.
3. Bao C, Bao S. Neonate Death Due to Marijuana Toxicity to the Liver and Adrenals. *The American journal of case reports* 2019; 20: 1874–1878. doi: 10.12659/AJCR.919545 **Reason for rejection:** This is a case report.
4. Bell GL, Lau K. Perinatal and neonatal issues of substance abuse. *Pediatric Clinics of North America* 1995; 42 (2): 261 – 281. doi: 10.1016/S0031-3955(16)38946-5 **Reason for rejection:** This is a review.
5. Benevenuto SG, Domenico MD, Martins MAG, et al. Recreational use of marijuana during pregnancy and negative gestational and fetal outcomes: An experimental study in mice. *Toxicology* 2017; 376: 94-101. doi: 10.1016/j.tox.2016.05.020 **Reason for rejection:** The study population is animals
6. Bergeria CL, Heil SH. Surveying Lactation Professionals Regarding Marijuana Use and Breastfeeding. *Breastfeeding Medicine* 2015; 10 (7): 377-380. doi: 10.1089/bfm.2015.0051 **Reason for rejection:** It doesn't answer the question of the study.
7. Berenson AB, Wilkinson GS, Lopez LA. Effects of prenatal care on neonates born to drug-using women. *Substance Use and Misuse* 1996; 31 (8): 1063 – 1076. doi: 10.3109/10826089609072288 **Reason for rejection:** The full text was not available.
8. Berra A, Kamo S, Mohnot S, et al. The Association between Antenatal Maternal Self-reported Substance Use, Maternal Characteristics, and Obstetrical Variables. *Journal of Addiction Medicine* 2019; 13 (6): 464 – 469. doi:10.1097/ADM.0000000000000521. **Reason for rejection:** It refers more generally to the use of substance use
9. Blandthorn J, Forster DA, Love Veronica. Neonatal and maternal outcomes following maternal use of buprenorphine or methadone during pregnancy: Findings of a retrospective audit. *Women and Birth*

2011; 24 (1): 32 – 39. doi: 10.1016/j.wombi.2010.07.00 **Reason for rejection:** Not related to the topic.

10. Brown HL, Britton KA, Mahaffey D, Brizendine E, Hiett AK, Turnquest MA. Methadone maintenance in pregnancy : A reappraisal. *American Journal of Obstetrics and Gynecology* 1998; 179 (2): 459 – 463. doi: 10.1016/S0002-9378(98)70379-5 **Reason for rejection:** Not related to the topic.
11. Carlier J, Huestis M, Zaami S, Pichini S, Busardò FP. Monitoring Perinatal Exposure to Cannabis and Synthetic Cannabinoids. *Therapeutic drug monitoring* 2020; 42 (2): 194-204. doi: 10.1097/FTD.0000000000000667 **Reason for rejection:** This is a review.
12. Coleman-Cowger VH, Oga E, Peters EN, Mark K. Prevalence and Associated Birth Outcomes of Co-Use of Cannabis and Tobacco Cigarettes during Pregnancy. *Neurotoxicology and Teratology* 2018; 68: 84-90. doi: 10.1016/j.ntt.2018.06.001 **Reason for rejection:** It is not a primary study.
13. Coles CD, Platzman KA, Smith I, James ME, Falek A. Effects of cocaine and alcohol use in pregnancy on neonatal growth and neurobehavioral status. *Neurotoxicology and Teratology* 1992; 14 (1): 23 – 33. doi: 10.1016/0892-0362(92)90025-6 **Reason for rejection:** Not related to the topic.
14. Crome IB, Kumar MT. Epidemiology of drug and alcohol use in young women. *Seminars in Fetal and Neonatal Medicine* 2007; 12 (2): 98 – 105. doi: 10.1016/j.siny.2006.12.002 **Reason for rejection:** Not related to the topic.
15. Davis E, Lee T, Weber T J, Budgen S. Cannabis use in pregnancy and breastfeeding : The pharmacist's role. *CPJRPC* 2020; 153(2) pp 95-100. doi: 10.1177/1715163519893395 **Reason for rejection:** This is a review.
16. Debelak K, Morrone WR, O'Grady KE, Jones HE. Buprenorphine + naloxone in the treatment of opioid dependence during pregnancy - Initial patient care and outcome data. *American Journal on Addictions* 2013; 22 (3): 252 – 254. doi: 10.1111/j.1521-0391.2012.12005.x **Reason for rejection:** Not related to the topic.
17. Dong C, Chen J, Harrington A, Vinod Yaragudri K, Hegde M, Hegde L V. Cannabinoid exposure during pregnancy and its impact on immune function. *Cellular and Molecular Life Sciences* 2018; 76 (4): 729-743. doi : 10.1007/s00018-018-2955-0 **Reason for rejection:** This is a review

18. Emery RL, Gregory MP, Grace JL, Levine MD. Prevalence and correlates of a lifetime cannabis use disorder among pregnant former tobacco smokers. *Addictive behaviors* 2015; 54: 52-58. doi:10.1016/j.addbeh.2015.12.008 **Reason for rejection:** It doesn't answer the question of the study.
19. Eyler FD, Behnke M, Conlon M, Woods NS, Wobie K. Birth outcome from a prospective, matched study of prenatal crack/cocaine use: II. Interactive and dose effects on neurobehavioral assessment. *Pediatrics* 1998; 101 (2): 237 – 241. doi : 10.1542/peds.101.2.237 **Reason for rejection:** Not related to the topic
20. Fischer G, Johnson RE, Eder H, et al. Treatment of opioid-dependent pregnant women with buprenorphine. *Addiction* 2000; 95 (2): 239 – 244. doi:10.1046/j.1360-0443.2000.95223910.x **Reason for rejection:** Not related to the topic.
21. Fonseca BM, Correia-da-Silva G, Almada M, Costa MA, Teixeira NA. The Endocannabinoid System in the Postimplantation Period: A Role during Decidualization and Placentation. *International journal of endocrinology* 2013. doi: 10.1155/2013/510540. **Reason for rejection:** It doesn't answer the question of the study.
22. Frank DA, Jacobs RR, Beeghly M, et al. Level of Prenatal Cocaine Exposure and Scores on the Bayley Scales of Infant Development: Modifying Effects of Caregiver, Early Intervention , and Birth Weight. *Pediatrics* 2002; 110(6): 1143-52. doi : 10.1542/peds.110.6.1143 **Reason for rejection:** Not related to the topic.
23. Frau R, Miczán V, Traccis F. Prenatal THC exposure produces a hyperdopaminergic phenotype rescued by pregnenolone. *Nature neuroscience* 2019; (12): 1975- 1985. doi : 10.1038/s41593-019-0512-2 **Reason for rejection:** It refers to animals and full text is not available.
24. Geraldine GA, Aiton NR. Intrauterine illicit drug exposure and neurodevelopmental outcomes for children: how current literature informs management and assessment. *Paediatrics and Child Health (United Kingdom)* 2017; 27 (8): 383 – 387. doi: 10.1016/j.paed.2017.05.003 **Reason for rejection:** This is a review and it doesn't answer the question of the study
25. Gibson GT, Baghurst PA, Colley DP. Maternal Alcohol, Tobacco and Cannabis Consumption and the Outcome of Pregnancy. *Australian and New Zealand Journal of Obstetrics and Gynaecology* 1983; 23 (1): 15 – 19. doi:10.1111/j.1479-828X.1983.tb00151.x **Reason for rejection:** It is not a primary study.

26. Gobbi G, Atkin T, Zytynski T, et al. Association of Cannabis Use in Adolescence and Risk of Depression, Anxiety, and Suicidality in Young Adulthood : A Systematic Review and Meta-analysis. *JAMA Psychiatry* 2019; (4): E1-E9. doi: 10.1001/jamapsychiatry.2018.4500 **Reason for rejection:** This is a systematic review and meta-analysis.
27. Godleski SA, Shisler S, Eiden RD, Huestis MA. Co-use of tobacco and marijuana during pregnancy: Pathways to externalizing behavior problems in early childhood. *Neurotoxicology and Teratology* 2018; 69: 39-48. doi : 10.1016/j.ntt.2018.07.003 **Reason for rejection:** It doesn't answer the question of the study.
28. Goel N , Beasley D, Rajkumar V, Banerjee S. Perinatal outcome of illicit substance use in pregnancy-comparative and contemporary socio-clinical profile in the UK. *European Journal of Pediatrics* 2011; 170 (2): 199 – 205. doi: 10.1007/s00431-010-1284-6 **Reason for rejection:** It doesn't answer the question of the study.
29. Goldschmidt L, Richardson GA, Larkby C, Day NL. Early marijuana initiation: The link between prenatal marijuana exposure, early childhood behavior, and negative adult roles. *Neurotoxicology and Teratology* 2016; 58: 40-45. doi: 10.1016/j.ntt.2016.05.011 **Reason for rejection :** The results of the study do not answer the question of the study.
30. Goldschmidt L, Richardson GA, Willford JA, Severtson SG, Day NL (2011). School achievement in 14-year-old youths prenatally exposed to marijuana. *Neurotoxicology and Teratology* 2011; 34 (1): 161-167. doi: 10.1016/j.ntt.2011.08.009 **Reason for rejection:** It refers to teenagers.
31. Gopalan P, Moses-Kolko E, Valpey R, Shenai N, Smith E. Benzodiazepine withdrawal in pregnant women with opioid use disorders: An observational study of current clinical practices at a tertiary obstetrical hospital. *General Hospital Psychiatry* 2019; 57: 29-33. doi: 10.1016/j.genhosppsy.2018.12.005 **Reason for rejection:** It is not related to the topic.
32. Gnofam M, Allshouse A, Stickrath EH, Metz TD. Impact of marijuana legalization on prevalence of maternal marijuana use and perinatal outcomes. *American Journal of Perinatology* 2020; 37 (1): 59 – 65. doi:10.1055/s-0039-1696719 **Reason for rejection:** It doesn't answer the question of the study and the full text is not available.
33. Grant SK, Petroff R, Isoherranen N, Stella N, Burbacher MT. Cannabis Use during Pregnancy :Pharmacokinetics and Effects on Child Development . *Pharmacology & therapeutics* 2017; 182: 133-

151. doi: 10.1016/j.pharmthera.2017.08.014 **Reason for rejection:** This is a review.

34. Gunn, JKL, Rosales BC , Center KE, et al. Prenatal exposure to cannabis and maternal and child health outcomes: a systematic review and meta-analysis. *BMJ Open* 2016; (4): 1-8. doi : 10.1136/bmjopen-2015-009986 **Reason for rejection:** This is a systematic review and meta-analysis.
35. Hill M, Reed K. Pregnancy, breast-feeding, and marijuana: A review article. *Obstetrical and Gynecological Survey* 2013; 68 (10): 710 – 718. doi:10.1097/01.ogx.0000435371.51584.d1 **Reason for rejection:** This is a review.
36. Hingson R, Zuckerman B, Amaro H, et al. Maternal Marijuana Use and Neonatal Outcome: Uncertainty Posed by Self-Reports. *American Journal of Public Health* 1986; (6): 667-669. doi: 10.2105/ajph.76.6.667 **Reason for rejection:** It doesn't answer the question of the study.
37. Huestis MA, Choo RE. Drug abuse's smallest victims: In utero drug exposure. *Forensic Science International* 2002; 128 (1-2): 20 – 30. doi:10.1016/S0379-0738(02)00160-3 **Reason for rejection :** This is a conference paper and it doesn't answer the question of the study.
38. Huizink AC. Prenatal cannabis exposure and infant outcomes: Overview of studies . *Progress in Neuro-Psychopharmacology and Biological Psychiatry* 2014; 52: 45 – 52. doi: 10.1016/j.pnpbp.2013.09.014 **Reason for rejection:** This is an overview of already existing studies.
39. Jansson LM, Velez ML. Infants of drug-dependent mothers. *Pediatrics in Review* 2011; 32 (1): 5 – 13. doi:10.1542/pir.32-1-5 **Reason for rejection:** It doesn't answer the question of the study.
40. Johnson S, Martin PR. Transitioning from methadone to buprenorphine maintenance in management of opioid use disorder during pregnancy. *American Journal of Drug and Alcohol Abuse* 2018; 44 (3): 310 – 316. doi:10.1080/00952990.2017.1363218 **Reason for rejection:** It's not related to the topic
41. Keegan J, Parva M, Finnegan M, Gerson A, Belden M. Addiction in pregnancy. *Journal of Addictive Diseases* 2010; 29 (2): 175 – 191. doi: 10.1080/10550881003684723 **Reason for rejection:** This is a review and doesn't answer the question of the study.
42. Logan BA, Brown MS., Hayes MJ. Neonatal abstinence syndrome: Treatment and pediatric outcomes .*Clinical Obstetrics and*

Gynecology 2013; 56 (1): 186 – 192.  
doi:10.1097/GRF.0b013e31827feea4 **Reason for rejection:** This is a conference paper and doesn't answer the question of the study.

43. Louw KA. Substance use in pregnancy: The medical challenge. *Obstetric Medicine* 2018; 11 (2) :54-66. doi: 10.1177/1753495X17750299 **Reason for rejection:** This is a review.
44. Mark K, Pierce E., Joseph D, Crimmins S. Interaction with the justice system and other factors associated with pregnant women's self-report and continuation of use of marijuana. *Drug and Alcohol Dependence* 2020; 206: 1-5. doi:10.1016/j.ntt.2016.05.011 **Reason for rejection:** It doesn't answer the question of the study.
45. Mcallister-Williams RH, Baldwin DS, Cantwell R, et al. British Association for Psychopharmacology consensus guidance on the use of psychotropic medication preconception, in pregnancy and postpartum. *Journal of Psychopharmacology* 2017; 31 (5): 519 – 552. doi: 10.1177/0269881117699361 **Reason for rejection:** It's not related to the topic.
46. McCauley-Elsom K, Kulkarni J. Managing psychosis in pregnancy. *Australian and New Zealand Journal of Psychiatry* 2007; 41 (3): 289 – 292. doi:10.1080/00048670601172798 **Reason for rejection:** It's not related to the topic.
47. Mertz TD, Allshouse AA, Hogue CJ, et al. Maternal marijuana use, adverse pregnancy outcomes, and neonatal morbidity. *American Journal of Obstetrics and Gynecology* 2017; 217 (4): 478.e1- 478.e.7. doi: 10.1016/j.ajog.2017.05.050 **Reason for rejection:** This is a secondary analysis.
48. Mertz TD, Stickrath EH. Marijuana use in pregnancy and lactation: a review of the evidence. *American Journal of Obstetrics and Gynecology* 2015; 213 (6):761-778. doi: 10.1016/j.ajog.2015.05.025 **Reason for rejection:** This is a review.
49. Metz TD, Borgelt LM. Marijuana Use in Pregnancy and While Breastfeeding. *Obstetric Gynecology* 2018; 132 (5): 1198-1210. doi: 10.1097/AOG.0000000000002878 **Reason for rejection:** This is not a primary study.
50. Minnes S, Lang A, Singer L. Prenatal Tobacco, Marijuana, Stimulant, and Opiate Exposure: Outcomes and Practice Implications. *National Institute on Drug Abuse* 2011; (1): 57-70. doi: 10.1097/AOG.0000000000002878 **Reason for rejection:** This is a review.

51. Monnier D, Tucciarone D, Fair S. Multidisciplinary Management Pulmonary Arterial Hypertension in Pregnancy. *JOGNN - Journal of Obstetric, Gynecologic, and Neonatal Nursing* 2015; 44: S84. doi:10.1111/1552-6909.12593 **Reason for rejection:** It's not related to the topic.
52. Morris CV, DiNieri JA, Szutorisz H, Hurd YL. Molecular mechanisms of maternal cannabis and cigarette use on human neurodevelopment. *The European journal of neuroscience* 2011;( 10): 1574-1583. doi: 10.1111/j 1460-9568.2011.07884.x **Reason for rejection:** This is a review.
53. Passey ME, Sanson-Fisher RW, D'Este CA, Stirling JM. Tobacco, alcohol and cannabis use during pregnancy: Clustering of risks. *Drug and Alcohol Dependence* 2014; 134: 44-50. doi: 10.1016/j.drugalcdep.2013.09.008 **Reason for rejection:** It doesn't answer the question of the study.
54. Petrangelo A, Czuzoj-Shulman N, Balayla J, Abenhaim HA. Cannabis Abuse or Dependence During Pregnancy: A Population-Based Cohort Study on 12 Million Births. *Journal of Obstetrics and Gynaecology Canada* 2019; 41 (5): 623 – 630 doi:10.1016/j.jogc.2018.09.009 **Reason for rejection:** The full text is not available
55. Rebbe R, Mienko JA ,Brown E , Rahbar-Rowhani A. Hospital Variation in Child Protection Reports of Substance Exposed Infants. *The Journal of Pediatrics* 2019; 208: 141-147E2. doi:10.1016/j.jpeds.2018.12.065 **Reason for rejection :** It doesn't answer the question of the study.
56. Richardson GA, Hamel SC, Goldschmidt L, Day NL. The effects of prenatal cocaine use on neonatal neurobehavioral status. *Neurotoxicology and Teratology* 1996; 18 (5): 519 – 528 doi:10.1016/0892-0362(96)00062-1 **Reason for rejection:** It is not related to the topic.
57. Roncero C, Valriberas-Herrero I, Mezzatesta-Gava M, Villegas L J, Aguilar L, Grau-López L. Cannabis use during pregnancy and its relationship with fetal developmental outcomes and psychiatric disorders. A systematic review. *Reproductive health* 2020; 17 (25): 1-9. doi: 10.1186/s12978-020-0880-9. **Reason for rejection:** This is a systematic review.
58. Roth CK, Satran LA, Smith SM(2015). Marijuana Use in Pregnancy. *Nursing for Women's Health* 2015; 19 (5): 431 – 437. doi:10.1111/1751-486X.12235 **Reason for rejection:** This is not a primary study and the full text is not available

59. Ryan SA, Ammerman SD, O' Connor ME. Marijuana use During pregnancy And Breastfeeding: Implications for Neonatal and Childhood Outcomes. *Pediatrics* 2018; 142 (3): 1-11. doi: 10.1542/peds.2018-1889 **Reason for rejection:** This is not a primary study
60. Sharapova SR, Phillips E, Sirocco K , Kaminski JW, Leeb RT, Rolle I. Effects of Prenatal Marijuana Exposure on Neuropsychological Outcomes in Children Aged 1-11 Years: A Systematic Review. *Paediatric and perinatal epidemiology* 2018; 32 (6): 512-532. doi: 10.1111/ppe. 12505 **Reason for rejection:** This is a systematic review.
61. Shi Y, Zhong S. Trends in Cannabis Use Disorder among Pregnant Women in the U.S., 1993–2014. *Journal of general internal medicine* 2017; 33 (3): 245-246. doi: 10.1007/s11606-017-4201-0 **Reason for rejection:** It doesn't answer the question of the study.
62. Shieh C, Kravitz M. Severity of drug use, initiation of prenatal care, and maternal-fetal attachment in pregnant marijuana and cocaine/heroin users *JOGNN - Journal of Obstetric, Gynecologic, and Neonatal Nursing* 2006; 35 (4): 499 – 508. doi:10.1111/j.1552-6909.2006.00063.x **Reason for rejection:** It doesn't answer the question of the study.
63. Singer LT, Moore DG, Fulton S, et al. Neurobehavioral outcomes of infants exposed to MDMA (Ecstasy) and other recreational drugs during pregnancy. *Neurotoxicology and Teratology* 2012; 34 (3): 303 – 310. doi:10.1016/j.ntt.2012.02.001 **Reason for rejection:** It is not related to the topic.
64. Singer LT, Yamashita T, Hawkins S, Cairns D, Baley J, Kliegman R. Increased incidence of intraventricular hemorrhage and developmental delay in cocaine-exposed, very low birth weight infants. *The Journal of Pediatrics* 1994; 124 (5 PART 1): 765 – 771. doi:10.1016/S0022-3476(05)81372-1 **Reason for rejection:** It is not related to the topic.
65. Skelton KR, Hecht AA, Benjamin-Neelon SE. Recreational cannabis legalization in the US and maternal use during the preconception, prenatal and postpartum periods. *International Journal of Environmental Research and Public Health* 2020; 17 (3): 1-11. doi: 10.3390/ijerph17030909 **Reason for rejection:** It doesn't answer the question of the study.
66. Smith LM, LaGasse LL, Derauf C, et al. Prenatal methamphetamine use and neonatal neurobehavioral outcome. *Neurotoxicology and Teratology* 2008; 30 (1): 20-28. doi: 10.1016/j.ntt.2007.09.005 **Reason for rejection:** It is not related to the topic.



67. Sonon Ke, Richardson GA , Cornelius JR, Kim KH , Day NL. Prenatal Marijuana Exposure Predicts Marijuana Use in Young Adulthood. *Neurotoxicology and Teratology* 2014; 47: 10-15. doi: 10.1016/j.ntt.2014.11.003 **Reason for rejection:** It doesn't answer the question of the study.
68. Stone KC, LaGasse LL, Lester BM, et al. The Maternal Lifestyle Study: Sleep Problems in Children with Prenatal Substance Exposure. *The Maternal Lifestyle Study. Archives of Pediatrics and Adolescent Medicine* 2010; 164 (5): 452-456 doi: 10.1001/archpediatrics.2010.52 **Reason for rejection:** It doesn't answer the question of the study.
69. Sun X, Dey SK. Endocannabinoid Signaling in Female Reproduction. *ACS CHEMICAL NEUROSCIENCE* 2012; 3 (5): 349-351 doi: 10.1021/cn300014e **Reason for rejection :** This is a conference paper and doesn't answer the question of the study.
70. Thompson R, De Jong K, Lo J. Marijuana Use in Pregnancy: A Review. *Obstetrical & gynecological survey* 2019; 74 (7): 415–428. doi: 10.1097/OGX.0000000000000685 **Reason for rejection:** This is a review
71. Tirado-Muñoz J, Lopez-Rodriguez AB, Fonseca F, Farré M, Torrens M, Viveros MP. Effects of cannabis exposure in the prenatal and adolescent periods: Preclinical and clinical studies in both sexes. *Frontiers in Neuroendocrinology* 2020; 57: 1-22. doi: 10.1016/j.yfrne.2020.100841 **Reason for rejection:** This is a review.
72. Traccis F, Frau R, Melis M. Gender Differences in the Outcome of Offspring Prenatally Exposed to Drugs of Abuse. *Frontiers in Behavioral Neuroscience* 2020; 145 (72). doi:10.3389/fnbeh.2020.00072 **Reason for rejection:** This is a review not related to the topic
73. Viteri OA, Mendez-Figueroa H, Pedroza C, Leon MG, Sibai BM, Chauhan SP. Relationship between Self-Reported Maternal Substance Abuse and Adverse Outcomes in the Premature Newborn. *American Journal of Perinatology* 2016. 33 (2): 165 – 171. doi: 10.1055/s-0035-1563549 **Reason for rejection:** This is a conference paper.
74. Von Mandach U. Drug use in pregnancy[Drogen in der schwangerschaft]. *Therapeutische Umschau* 2005; 62 (1): 29 – 35.

doi:10.1024/0040-5930.62.1.29 **Reason for rejection:** This is a review not related to the topic.

75. Wellfens K, Derisbourg S, Costa E, et al. The “Cocoon,” first alongside midwifery-led unit within a Belgian hospital: Comparison of the maternal and neonatal outcomes with the standard obstetric unit over 2 years. *Birth* 2020; 47(1): 115 – 122. doi: 10.1111/birt.12466 **Reason for rejection:** It is not related to the topic
76. Wong SPW, Twynstra J, Gilliland JA, Cook JL, Seabrook J. Risk Factors and Birth Outcomes Associated with Teenage Pregnancy: A Canadian Sample. *Journal of Pediatric and Adolescent Gynecology* 2020; 33 (2): 153-159. doi: 10.1016/j.jpag.2019.10.006 **Reason for rejection:** It doesn't answer the question of the study.
77. Young-Wolf KC, Sarovar V, Tucker LY, Conway A, Alexeeff S, Weisner C, Armstrong MA, Goler N. Self-reported Daily, Weekly, and Monthly Cannabis Use Among Women Before and During Pregnancy. *JAMA Network open* 2019A; 2 (7): 1-10. doi: 10.1001/jamanetworkopen.2019.6471 **Reason for rejection:** It doesn't answer the question of the study.
78. Young-Wolff KC, Sarovar V, Tucker LY, et al. Trends in marijuana use among pregnant women with and without nausea and vomiting in pregnancy, 2009 to 2016. *Drug and Alcohol Dependence* 2019B; 196: 66-70. doi: 10.1016/j.drugalcdep.2018.12.009 **Reason for rejection:** It doesn't answer the question of the study.
